# Supplementary material for: A Predictive Pharmacokinetic Model for Immune Cell-Mediated Uptake and Retention of Nanoparticles in Tumors
Source: MDPI journal article supplement (doi:10.3390/ijms232415664), 2022-12-10
Supplement: s1 [file s1]

# Supplementary Information

*Article*

## A Predictive Pharmacokinetic Model for Immune Cell-Mediated Uptake and Retention of Nanoparticles in Tumors

Ailton Sousa-Junior <sup>1,2,†</sup>, Chun-Ting Yang <sup>3,†</sup>, Preethi Korangath <sup>3</sup>, Robert Ivkov <sup>3,4,5,6,\*</sup> and Andris Bakuzis <sup>1,7,\*</sup>

<sup>1</sup> Instituto de Física, Universidade Federal de Goiás, Goiânia 74690-900, GO, Brazil

<sup>2</sup> FarmaTec—Laboratório de Tecnologia Farmacêutica, Universidade Federal de Goiás, Goiânia 74690-631, GO, Brazil

<sup>3</sup> Department of Radiation Oncology and Molecular Radiation Sciences, Johns Hopkins University School of Medicine, Baltimore, MD 21218, USA

<sup>4</sup> Department of Oncology, Johns Hopkins University School of Medicine, Baltimore, MD 21218, USA

<sup>5</sup> Department of Mechanical Engineering, Whiting School of Engineering, Johns Hopkins University, Baltimore, MD 21218, USA

<sup>6</sup> Department of Materials Science and Engineering, Whiting School of Engineering, Johns Hopkins University, Baltimore, MD 21218, USA; rivkov1@jhmi.edu

<sup>7</sup> CNanoMed, Universidade Federal de Goiás, Goiânia 74690-631, GO, Brazil

\* Correspondence: rivkov1@jhmi.edu (R.I.); bakuzis@ufg.br (A.B.)

† These authors contributed equally to this work.

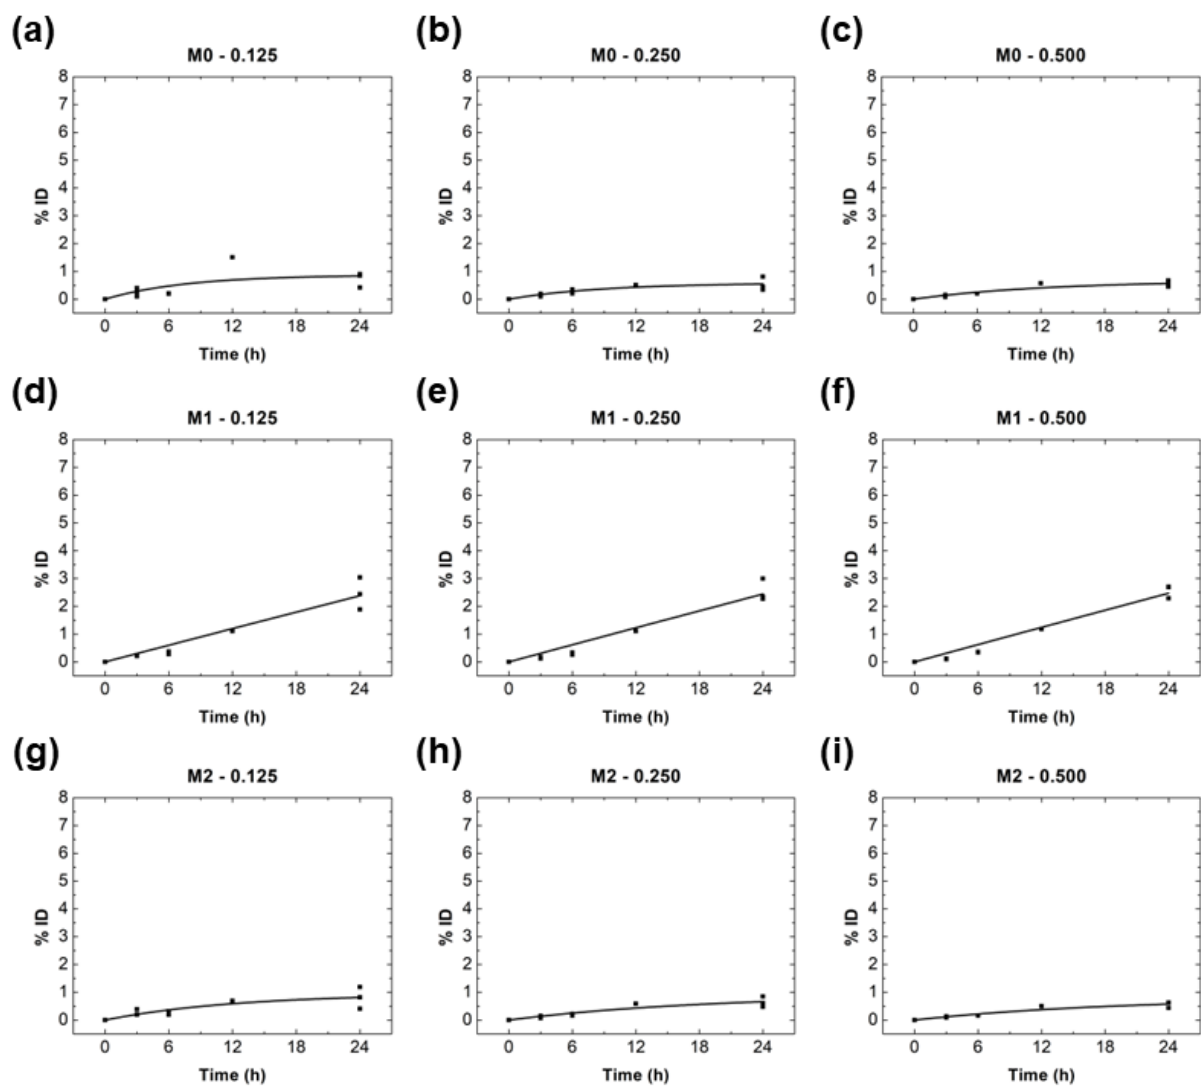

**Figure S1. *In vitro* BNF-Plain uptake by macrophages.** Fitting of the macrophage internalization kinetics  $x_{in}(t)$  (Equation 17 in the manuscript) using all *in vitro* experimental values obtained for BNF-Plain (ferene-s assay at 3, 6, 12, and 24 h, replicates included), for three different initial doses (0.125, 0.250, or 0.500 mg of Fe) and three macrophage polarization states (M0, M1, and M2).

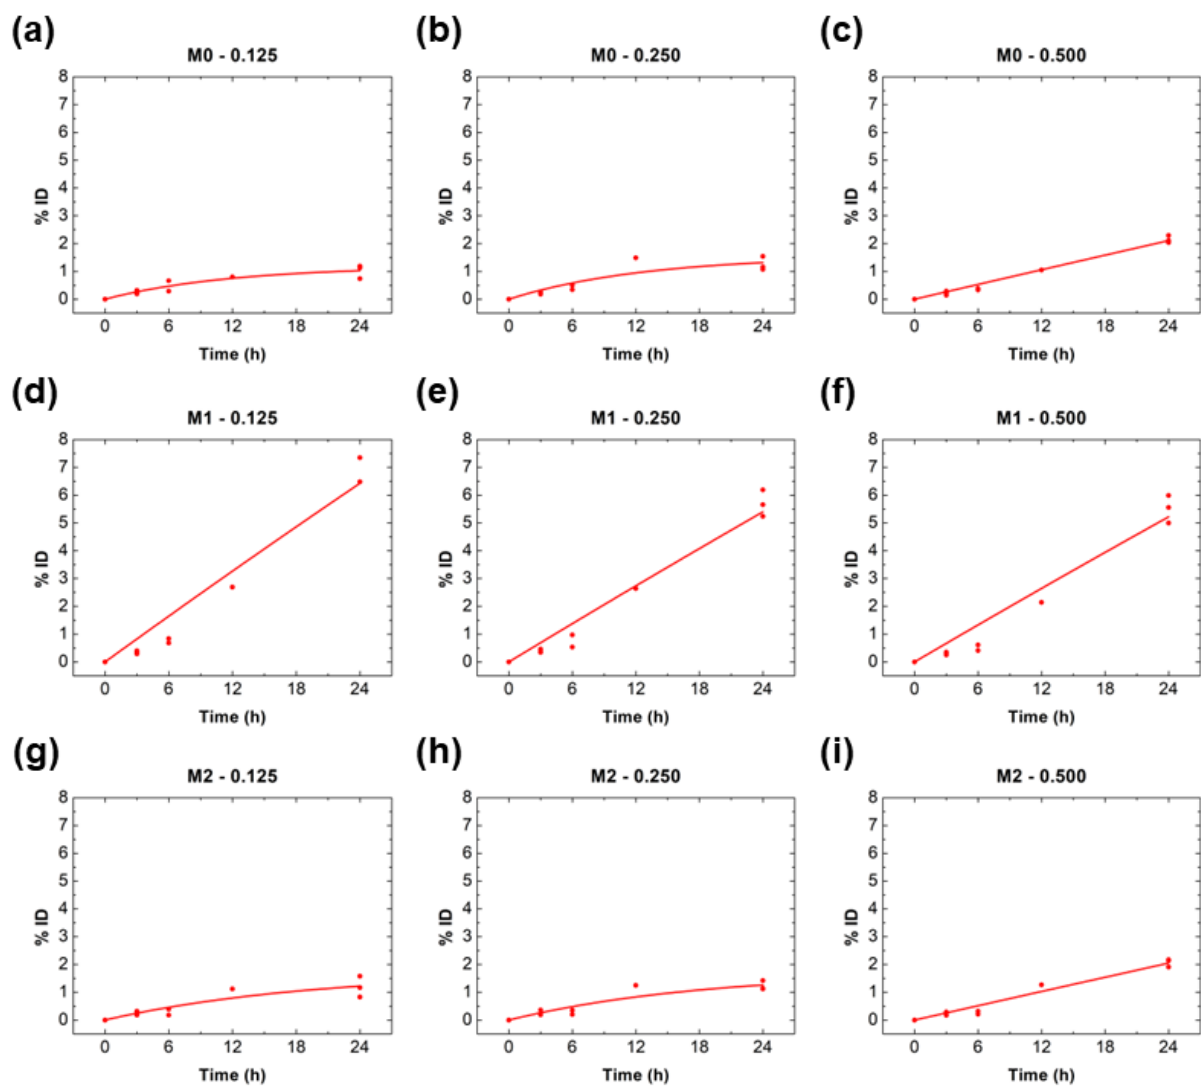

**Figure S2. *In vitro* BNF-Her uptake by macrophages.** Fitting of macrophage internalization kinetics  $x_{in}(t)$  (Equation 17 in the manuscript) using all *in vitro* experimental values obtained for BNF-Her (ferene-s assay at 3, 6, 12, and 24 h, replicates included), for three different initial doses (0.125, 0.250, or 0.500 mg of Fe) and three macrophage polarization states (M0, M1, and M2).

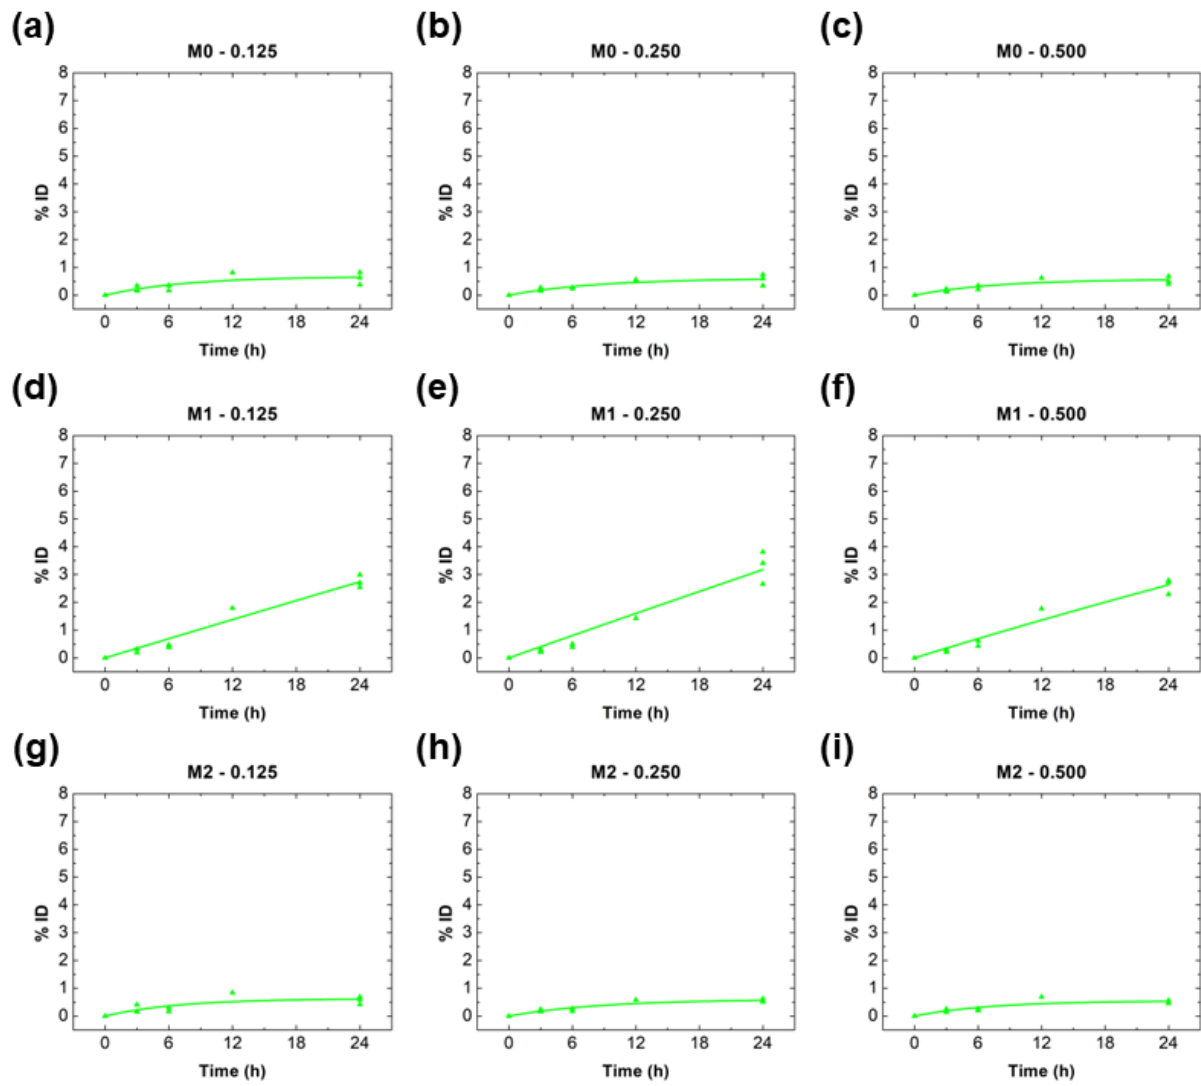

**Figure S3. *In vitro* BNF-IgG uptake by macrophages.** Fitting of macrophage internalization kinetics  $x_{in}(t)$  (Equation 17 in the manuscript) for all *in vitro* experimental values obtained for BNF-IgG (ferene-s assay at 3, 6, 12, and 24 h, replicates included), for three different initial doses (0.125, 0.250, or 0.500 mg of Fe) and three macrophage polarization states (M0, M1, and M2).

**Table S1. Values of  $K_{in}$  and  $K_{out}$  obtained from the fitting shown in Figures S1, S2, and S3 (fittings with all datapoints, including replicates, for each experimental setup)**

| BNF-Plain |           |                   |                   |                   |                   |  |
|-----------|-----------|-------------------|-------------------|-------------------|-------------------|--|
|           |           | 0.125             | 0.250             | 0.500             | Average*          |  |
| M0        | $K_{in}$  | 0,00114 ± 0,00072 | 0,00065 ± 0,00024 | 0,00052 ± 0,00014 | 0,00077 ± 0,00026 |  |
|           | $K_{out}$ | 0,12955 ± 0,11133 | 0,11112 ± 0,05940 | 0,07854 ± 0,03447 | 0,10640 ± 0,04360 |  |
| M1        | $K_{in}$  | 0,00100 ± 0,00034 | 0,00103 ± 0,00029 | 0,00104 ± 0,00023 | 0,00102 ± 0,00017 |  |
|           | $K_{out}$ | 0,00000 ± 0,02931 | 0,00000 ± 0,02459 | 0,00000 ± 0,01951 | 0,00000 ± 0,01432 |  |
| M2        | $K_{in}$  | 0,00077 ± 0,00034 | 0,00049 ± 0,00016 | 0,00042 ± 0,00010 | 0,00056 ± 0,00013 |  |
|           | $K_{out}$ | 0,07987 ± 0,05917 | 0,05260 ± 0,03734 | 0,05238 ± 0,02794 | 0,06162 ± 0,02511 |  |

| BNF-Her |           |                   |                   |                   |                   |  |
|---------|-----------|-------------------|-------------------|-------------------|-------------------|--|
|         |           | 0.125             | 0.250             | 0.500             | Average*          |  |
| M0      | $K_{in}$  | 0,00100 ± 0,00025 | 0,00121 ± 0,00039 | 0,00089 ± 0,00012 | 0,00103 ± 0,00016 |  |
|         | $K_{out}$ | 0,08307 ± 0,03440 | 0,07694 ± 0,04265 | 0,00000 ± 0,01229 | 0,05334 ± 0,01872 |  |
| M1      | $K_{in}$  | 0,00277 ± 0,00068 | 0,00231 ± 0,00050 | 0,00223 ± 0,00061 | 0,00244 ± 0,00035 |  |
|         | $K_{out}$ | 0,00000 ± 0,02137 | 0,00000 ± 0,01884 | 0,00000 ± 0,02373 | 0,00000 ± 0,01236 |  |
| M2      | $K_{in}$  | 0,00089 ± 0,00033 | 0,00095 ± 0,00028 | 0,00086 ± 0,00018 | 0,00090 ± 0,00016 |  |
|         | $K_{out}$ | 0,05085 ± 0,04213 | 0,05385 ± 0,03495 | 0,00000 ± 0,01832 | 0,03490 ± 0,01924 |  |

| BNF-IgG |           |                   |                   |                   |                   |  |
|---------|-----------|-------------------|-------------------|-------------------|-------------------|--|
|         |           | 0.125             | 0.250             | 0.500             | Average*          |  |
| M0      | $K_{in}$  | 0,00089 ± 0,00034 | 0,00072 ± 0,00022 | 0,00075 ± 0,00021 | 0,00078 ± 0,00015 |  |
|         | $K_{out}$ | 0,13067 ± 0,06873 | 0,11783 ± 0,05018 | 0,12914 ± 0,04866 | 0,12588 ± 0,03268 |  |
| M1      | $K_{in}$  | 0,00116 ± 0,00025 | 0,00134 ± 0,00038 | 0,00117 ± 0,00025 | 0,00122 ± 0,00017 |  |
|         | $K_{out}$ | 0,00000 ± 0,01879 | 0,00000 ± 0,02460 | 0,00450 ± 0,01867 | 0,00150 ± 0,01205 |  |
| M2      | $K_{in}$  | 0,00091 ± 0,00036 | 0,00068 ± 0,00014 | 0,00076 ± 0,00022 | 0,00078 ± 0,00015 |  |
|         | $K_{out}$ | 0,14298 ± 0,07659 | 0,11205 ± 0,03244 | 0,13642 ± 0,05334 | 0,13048 ± 0,03294 |  |

\*Average of the values found for each initial dose (0.125, 0.250, and 0.500 mg of Fe).

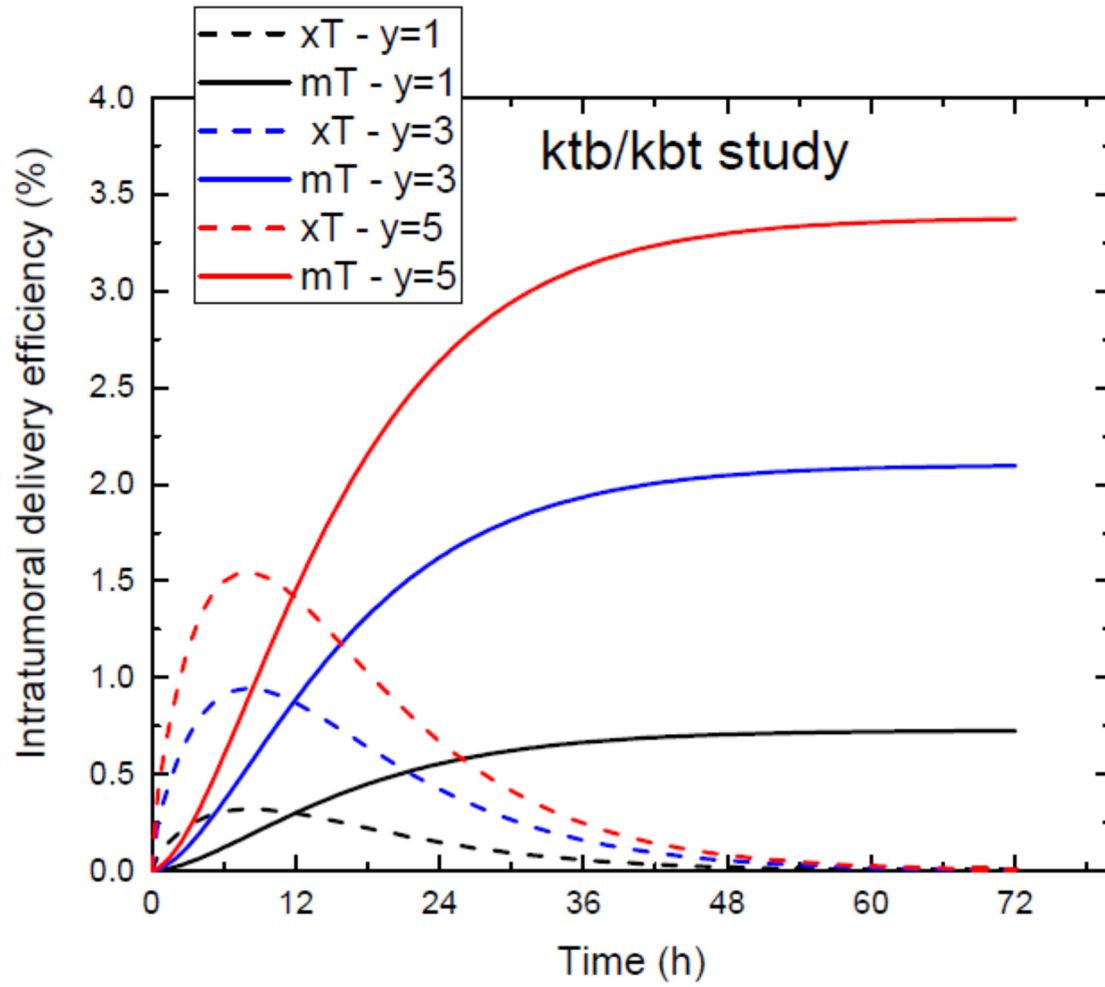

**Figure S4. Simulated intratumor retention of BNF-Her nanoparticles.** Simulated tumor retention of 100-nm BNF-Her nanoparticles varying the parameter  $K_{bt}$  and  $K_{tb}$  by increasing a factor  $y$ . Dashed lines represent passive retention ( $x_i$ ), and solid-colored lines represent active retention by macrophages ( $m_i$ ).
